# Supplementary material for: WB1, a Regulator of Endosperm Development in Rice, Is Identified by a Modified MutMap Method
Source: MDPI journal article supplement (doi:10.3390/ijms19082159), 2018-07-24
Supplement: s1 [file s1]

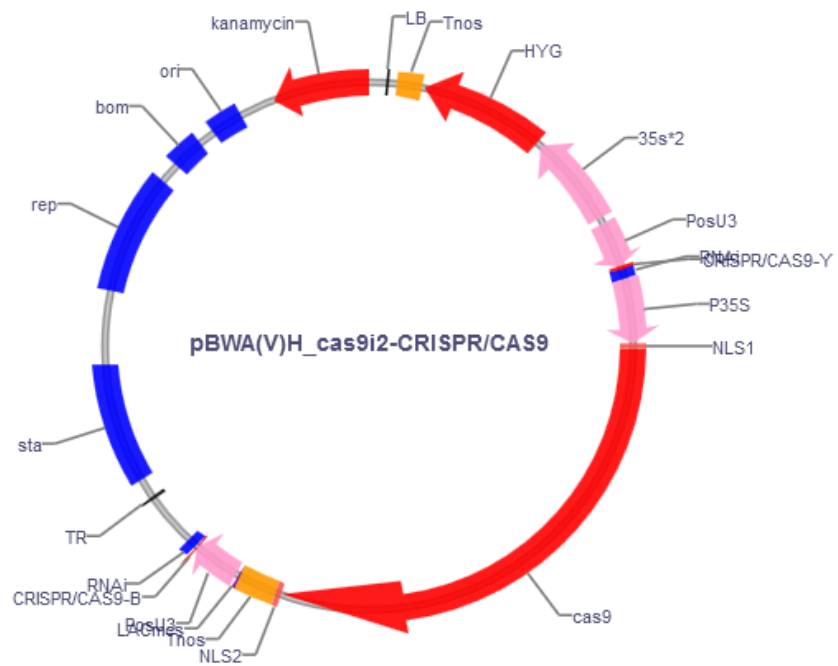

**Figure S1.** Vector construction for CRISPR/Cas9-mediated mutation.

**Table S1.** Comparison of important agronomic traits between WT and *wb1*

| Trait                        | WT                        | <i>wb1</i>    | P-Value              |
|------------------------------|---------------------------|---------------|----------------------|
| Plant height (cm)            | 52.85 ± 0.56 <sup>1</sup> | 53.02 ± 1.08  | P > 0.1 <sup>2</sup> |
| No. of panicles per plant    | 15.90 ± 0.80              | 15.90 ± 0.92  | P > 0.1              |
| No. of total grains/panicle  | 65.13 ± 1.25              | 51.40 ± 1.90  | P < 0.01             |
| No. of filled grains/panicle | 60.50 ± 1.25              | 36.32 ± 1.41  | P < 0.01             |
| Seed-setting rate (%)        | 92.87% ± 0.5%             | 71.10% ± 2.7% | P < 0.01             |
| 1000-grain weight(g)         | 27.67 ± 0.14              | 19.37 ± 0.29  | P < 0.01             |

<sup>1</sup> Mean ± SD. <sup>2</sup> Student's t-test of pairwise comparison of WT and *wb1* (\*P < 0.05, \*\* P < 0.01).

The measurement of each trait was repeated ten times (n = 10).

**Table S2.** Segregation of F2 grains derived from crosses of *wb1* with WT

| Cross combination | F1 grains | Segregation in F2 |             | $\chi^2_{(3:1)}$ |
|-------------------|-----------|-------------------|-------------|------------------|
|                   |           | Wild-type         | Mutant-type |                  |
| wb1×CLJ           | Wild-type | 820               | 267         | 0.11             |
| wb1×ZH8015        | Wild-type | 745               | 255         | 0.13             |

**Table S3.** Two samples re-sequencing datasets

| Samples | Conc. of DNA library (nM) <sup>1</sup> | Raw reads <sup>2</sup> | Raw length (bp) <sup>3</sup> | Raw bases (bp) <sup>4</sup> | Cleaned reads <sup>5</sup> | Cleaned bases (bp) <sup>6</sup> | Cleaned mean length (bp) <sup>7</sup> |
|---------|----------------------------------------|------------------------|------------------------------|-----------------------------|----------------------------|---------------------------------|---------------------------------------|
| Pool A  | 95.13                                  | 129,490,564            | 125                          | 32,372,641,000              | 125,252,285                | 30,143,545,611                  | 120.33                                |
| Pool B  | 93.77                                  | 124,662,017            | 125                          | 31,165,504,250              | 120,484,878                | 28,985,137,170                  | 120.29                                |

<sup>1</sup> Conc. indicates the concentration of DNA libraries used for Illumina sequencing; <sup>2</sup> Raw reads were produced from sequencing images via base calling with Casava 1.8.; <sup>3</sup> The original length (125bp; PE125 mode) of Raw reads; <sup>4</sup> The total bases of Raw reads; <sup>5</sup> Cleaned reads were obtained from the treated Raw reads (see Methods); <sup>6</sup> The total bases of Cleaned reads; <sup>7</sup> The mean length of Cleaned reads.

**Table S4.** Result of alignments of short reads to reference sequence.

| Samples | Total mapped reads <sup>1</sup> | Unique mapped reads <sup>2</sup> | Coverage (%) <sup>3</sup> |
|---------|---------------------------------|----------------------------------|---------------------------|
| Pool A  | 125,252,285                     | 110,119,455                      | 87.92                     |
| Pool B  | 120,484,878                     | 105,488,179                      | 87.55                     |

<sup>1</sup> Total mapped reads were the Cleaned reads; <sup>2</sup> Unique mapped reads were the specific reads aligned to the reference sequence in only one site, which excluded the reads aligned to the reference sequence in two or more sites; <sup>3</sup> Coverage was determined based on the alignments of short reads to the reference sequence.

**Table S6.** Primers used in this study

| Name    | Forward primer(5'→3')        | Reverse primer(5'→3')        | Purpose          |
|---------|------------------------------|------------------------------|------------------|
| W-H     | CCATCGAGCCCAGCATCAG          | CTCCGGTACACGTACGCCA          | Enzyme digestion |
| M-H     | CATCGAGCCCAGCATCAGG          | GCTCCGGTACACGTACGCC          | Enzyme digestion |
| Cas-seq | GCCCCCTACCACGGCTGAT          | CCGCCGGAAGTCCCTGCT           | Sequencing       |
| qPCR1   | ACACGTACAAGGCAGGAAATA<br>TC  | TAAAACCCTACCAGAAGCCACA<br>G  | qPCR             |
| qPCR2   | CAAGTGGTGCTTCCTTCTGA         | TTCCCTTTTGTCATTGGCT          | qPCR             |
| qPCR3   | TTTGGTGACAGAGATGGGTA         | CCTAAAGGATGGCTGGAAC          | qPCR             |
| qPCR4   | CAACGGGTTCATCTTCCTGG         | GAATGACCACCGATTTTAGGG        | qPCR             |
| qPCR5   | GCGAGAAGACATTTGAGTTGG        | ACATTATCCTCGTTTTTGGCA        | qPCR             |
| qPCR7   | CAGCAGGCAGGATACCACAA         | CTCCACACCAGGGGATGAC          | qPCR             |
| qPCR9   | TTTGTGAATGAAAAGGGTGC         | TTCGTGTTTGACTTGGGGAC         | qPCR             |
| qPCR10  | GCGTAGGAGCAGTAGGTGAG         | GTTCGGCGTGTCTGGAGAT          | qPCR             |
| qPCR11  | ATCCCTTATCTGGAGAGAAAA<br>A   | GAATGAAGAGCACCTGAGTT         | qPCR             |
| qPCR12  | CTCATTTTCTTCATTGGGGA         | ACCTTTTTTCTTGTGGGACC         | qPCR             |
| Seq1-1  | GGAGATTTTCCTTATGCGTTT        | GTTTATTGGTGCCTCGTGCTA        | Sequencing       |
| Seq1-2  | TTGGCGAAACTTATGTCATTG        | ATAGTGGTCCTGTACGGCTGT        | Sequencing       |
| Seq1-3  | TGATTCAACGCTCTATTTCTCTT<br>A | ATTGTATGTTATCCCATTTGTGTG     | Sequencing       |
| Seq2    | CCTTTTTATTTTCCCCTTTTT        | AGGACTACATTCTGGACCTGGT       | Sequencing       |
| Seq3    | CATCTGACCACAGGGCTTC          | AGGCATCTCGGATGTAGCA          | Sequencing       |
| Seq4-1  | GTGTAGACAAATATGCTCTCCG       | TTTGAAAAAAGCAACACAATC        | Sequencing       |
| Seq4-2  | AAAAGAAAAACGAAACGAAA<br>G    | CACAAGGCAAAATTATACCCC        | Sequencing       |
| Seq5-1  | ACATTCCTTTCGTATTCCAGA        | ATTGTTCCCACTTGTTCCG          | Sequencing       |
| Seq5-2  | AATTTTCTTTCTTTAACTCTGCA<br>A | TTCTTTGATTATCTGTTACCTGAA     | Sequencing       |
| Seq6-1  | TCCTCTCCTCTTCTCGCTCTCAC      | CACTAACTACAGTCCTCTCCCGT      | Sequencing       |
| Seq6-2  | GTGGGGGTGTGCTCTGCT           | GCCTTCCGGTCGTACGTT           | Sequencing       |
| Seq6-3  | GAACGTACGACCGGAAGG           | GGGACGAGAAGAAAGCG            | Sequencing       |
| Seq7    | TGAAAGAAATGTAGGCTAAAT<br>GC  | ACTCGGGATATGGGAAAGC          | Sequencing       |
| Seq8    | AAAAGTGAATGTCTGGTAGGT<br>G   | CTTCCGATATAAATCTGTGTCTGA     | Sequencing       |
| Seq9    | TCAAAACAATACCACATCCCG        | TGCTTCCATGAAGTGCAATCT        | Sequencing       |
| Seq10   | AGTGTTGATCGAGTCGTGGG         | GGCGCAAATTCATTGAGATT         | Sequencing       |
| Seq11   | CTCAAGCACATAGATAAACAA<br>CAA | CCTAGCAACATAATTCATTAGG<br>AT | Sequencing       |
| Seq12   | TTCTTCATTGGGGAGCCCTTT        | ATGCAACTCCTGGGAGGAGATG       | Sequencing       |
